# Supplementary material for: Density functional studies on (NCH)n azagraphane: activated surface for organocatalysis
Source: Royal Society of Chemistry journal article supplement (doi:10.1039/c4cp03429e), 2014-01-01
Supplement: c4cp03429e1.pdf [file c4cp03429e1.pdf]

## Supplementary Material

### Density Functional Studies on (NCH)<sub>n</sub> AzaGraphane: Activated Surface for Organocatalysis

S. Marutheeswaran, Pattath D. Pancharatna, Musiri M. Balakrishnarajan\*

*Department of Chemistry, Pondicherry University, Pondicherry, India – 605014*

e-mail: [mmbkr.che@pondiuni.edu.in](mailto:mmbkr.che@pondiuni.edu.in)

#### Index

|            |                                                                                                                                |     |
|------------|--------------------------------------------------------------------------------------------------------------------------------|-----|
| <b>S1.</b> | Optimized geometrical parameters of (NCH) <sub>n</sub> AzaGraphanes using GGA method .....                                     | S2  |
| <b>S2.</b> | Optimized geometrical parameters of (NCH) <sub>n</sub> AzaGraphanes using LDA method .....                                     | S3  |
| <b>S3.</b> | Comparison of relative energies for GGA and LDA method for the azagraphane isomers.....                                        | S4  |
| <b>S4.</b> | Band structure and PDOS of dehydrogenated Azagraphane.....                                                                     | S5  |
| <b>S5.</b> | Total Energy, Lattice parameters and fractional coordinates of optimized (NCH) <sub>n</sub> AzaGraphanes using GGA method..... | S6  |
| <b>S5.</b> | Total Energy, Lattice parameters and fractional coordinates of optimized (NCH) <sub>n</sub> AzaGraphanes using LDA method..... | S8  |
| <b>S7.</b> | Optimized geometrical parameters of Graphane Nanosheets using GGA method .....                                                 | S10 |

## S1. Optimized geometrical parameters of (NCH)<sub>n</sub> AzaGraphanes using GGA method

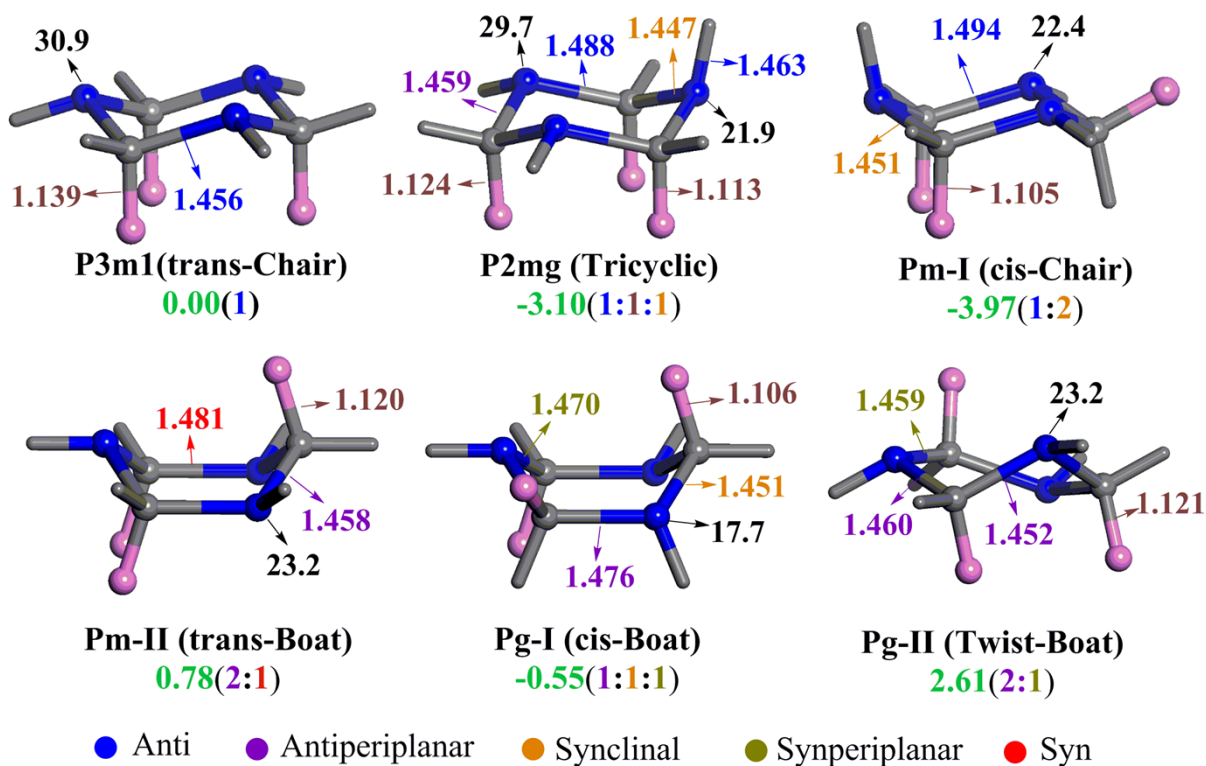

## S2. Optimized geometrical parameters of (NCH)<sub>n</sub> AzaGraphanes using LDA method

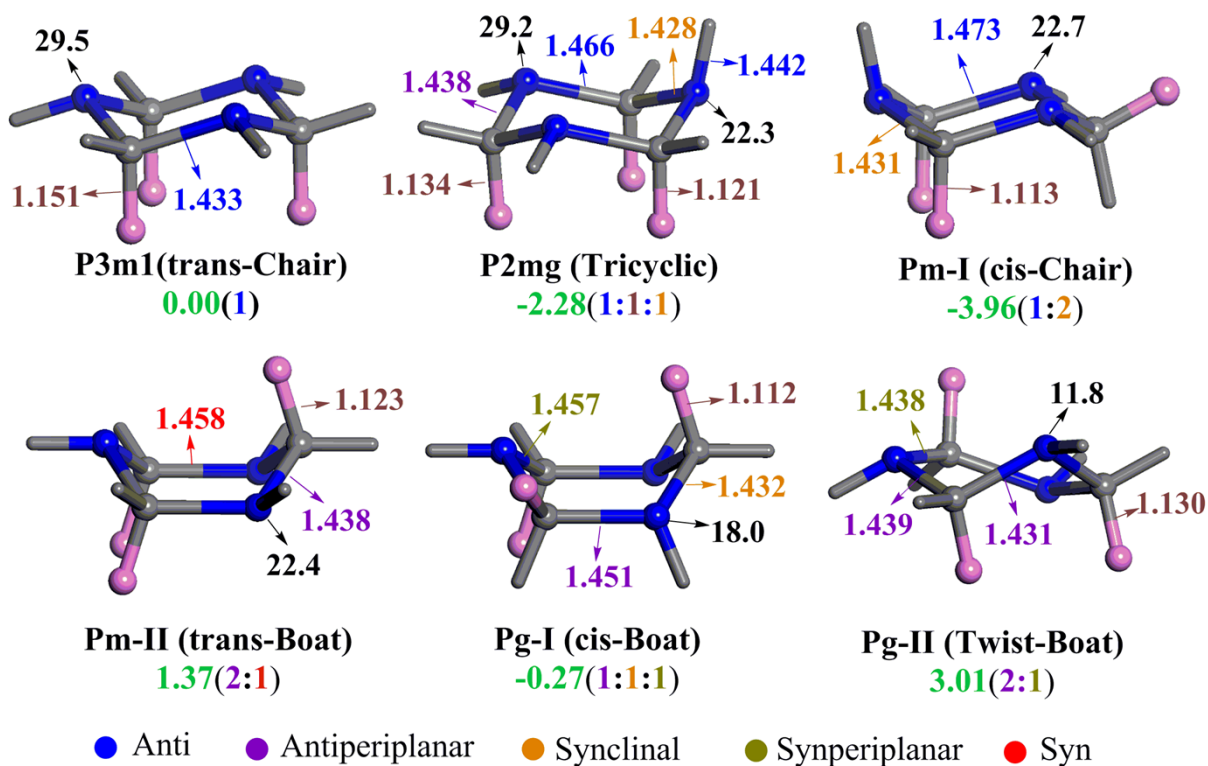

### S3. Comparison of relative energies for GGA and LDA method for the azagraphane isomers

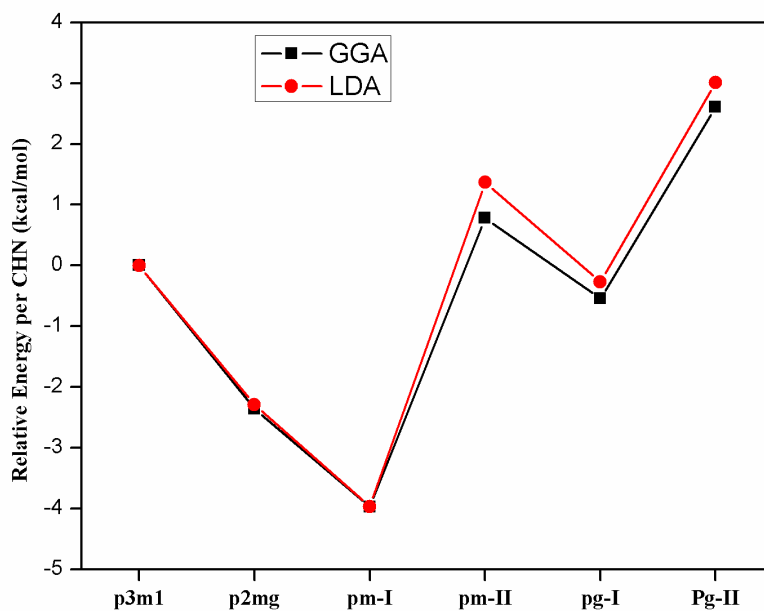

## S4. Band structure and PDOS of dehydrogenated Azagraphane

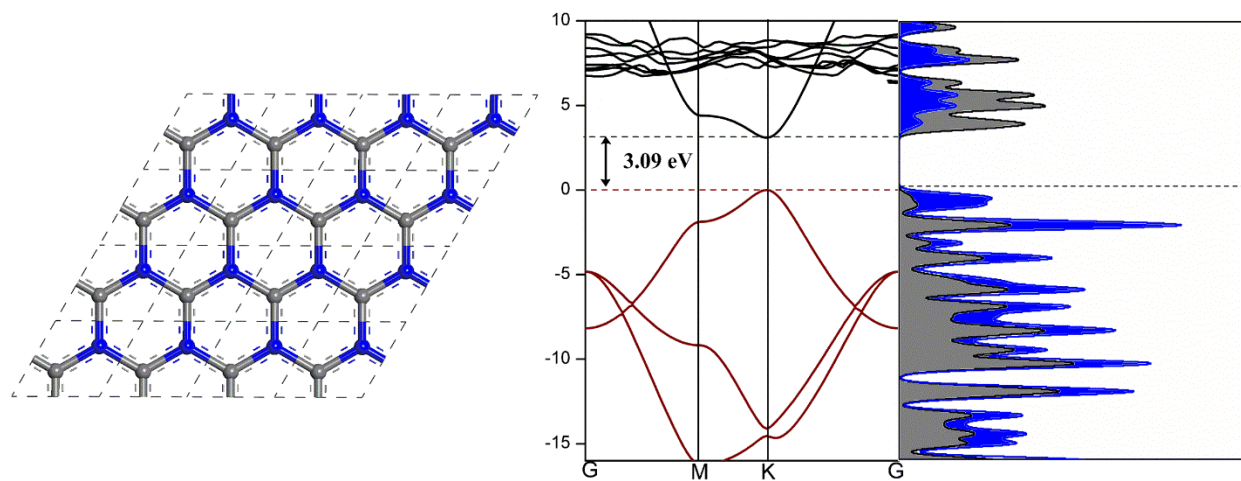

**BN analogue of (CN)<sup>+</sup>**

## S5. Total Energy, Lattice parameters and fractional coordinates of optimized (NCH)<sub>n</sub> AzaGraphanes using GGA method

### 1. P3m1 (Chair)

Total Energy = - 441.5475016455 eV

Lattice Parameters; a = b= 2.3808

|   |         |         |          |
|---|---------|---------|----------|
| N | 0.33333 | 0.66667 | -0.00936 |
| C | 0.66667 | 0.33333 | 0.00909  |
| H | 0.66667 | 0.33333 | 0.05295  |

### 2. P2mg (Tricyclic)

Total Energy = -1766.598628508 eV

Lattice Parameters; a = 2.3821 c = 7.2267

|   |          |          |         |
|---|----------|----------|---------|
| N | -0.00000 | 0.06365  | 0.93185 |
| C | -0.00000 | -0.00711 | 0.80334 |
| H | -0.00000 | -0.06801 | 0.88112 |
| C | 0.50000  | -0.06856 | 0.54511 |
| N | 0.50000  | -0.00120 | 0.68733 |
| H | 0.50000  | -0.13120 | 0.61265 |

### 3. Pm-I (Stirrup)

Total Energy = -883.4357836241 eV

Lattice Parameters; a = 2.3822 c = 3.5885

|   |          |         |         |
|---|----------|---------|---------|
| C | -0.00000 | 0.02355 | 0.35195 |
| H | -0.00000 | 0.06166 | 0.50067 |
| N | 0.50000  | 0.02121 | 0.12183 |

#### 4. Pm-II (Boat-I)

Total Energy = -883.0273714017 eV

Lattice Parameters; a = 2.3775 c = 4.0172

H -0.00000 0.05692 0.75112

C -0.00000 0.01502 0.81111

N -0.00000 0.01014 0.17839

#### 5. P<sub>g</sub>-I (Boat-II)

Total Energy = -1766.284607224 eV

Lattice Parameters; a = 4.3409 c = 4.0027

C -0.91038 0.02172 0.55077

H -0.00300 0.05745 0.47868

N -0.39948 -0.01804 0.91701

#### 6. P<sub>g</sub>-II (Twist-Boat)

Total Energy = -1765.737359638 eV

Lattice Parameters; a = 4.7013 b = 4.1341

C 0.12526 0.01875 0.54061

N 0.63708 0.00745 0.86224

H 0.15329 0.06882 0.55716

## S6. Total Energy, Lattice parameters and fractional coordinates of optimized (NCH)<sub>n</sub> AzaGraphanes using LDA method

### 1. P3m1 (Chair)

Total Energy = -442.1903507703 eV

Lattice Parameters; a = b = 2.3505

H 0.666667 0.333333 0.053061

C 0.666667 0.333333 0.008700

N 0.333333 0.666667 -0.009077

### 2. P2mg (Tricyclic)

Total Energy = -1769.158515355 eV

Lattice Parameters; a = 2.3528 c = 7.0817

N 0.00000 0.06441 0.93069

C 0.00000 -0.00585 0.80141

H 0.00000 -0.06747 0.88277

C 0.50000 -0.06888 0.54445

N 0.50000 -0.00108 0.68502

H 0.50000 -0.13166 0.61707

### 3. Pm-I (Stirrup)

Total Energy = -884.7244611970 eV

Lattice Parameters; a = 2.3548 c = 3.5141

C 0.00000 0.02353 0.34953

H 0.00000 0.06171 0.50655

N 0.50000 0.02115 0.11837

### 4. Pm-II (Boat-I)

Total Energy = -884.2617938318 eV

Lattice Parameters; a = 2.3478 c = 3.9614



H 0.00000 0.05706 0.74959  
C 0.00000 0.01492 0.81221  
N 0.00000 0.00970 0.17881

## 5. Pg-I (Boat-II)

Total Energy = -1768.807512688 eV

Lattice Parameters; a = 4.2589 c = 3.9452

C -0.91184 0.02173 0.55225  
H -0.00912 0.05751 0.47540  
N -0.40007 -0.01800 0.91881

## 6. Pg-II (Twist-Boat)

Total Energy = -1768.239049505 eV

Lattice Parameters; a = 4.6436 b = 4.0791

C 0.12462 0.01874 0.54053  
N 0.63627 0.00649 0.86297  
H 0.15279 0.06916 0.55652

## S7. Optimized geometrical parameters of Graphane Nanosheets using GGA method

### 1. P3m1 (Chair)

Total Energy = -342.2887515815 eV

Lattice Parameters; a = b= 2.5358

C 0.33333 0.66667 -0.00900

H 0.33333 0.66667 -0.05264

### 2. P2mg-I (Tricyclic)

Total Energy = -1369.017695313 eV

Lattice Parameters; b= 7.6856 c = 2.5385

C 0.06258 0.69363 0.25000

C -0.00179 0.55613 0.25000

H 0.11739 0.61977 0.25000

H -0.05841 0.62228 0.25000

### 3. Pm-I (Stirrup)

Total Energy = -684.3654977900 eV

Lattice Parameters; a = 2.5435 c= 3.8209

C 0.00000 0.02275 0.36383

H 0.00000 0.06108 0.50841

### 4. P2mm (Boat-I)

Total Energy = -684.1641296854 eV

Lattice Parameters; a = 2.5234 b= 4.3005

H -0.00000 0.74352 -0.05348

C -0.00000 0.81778 -0.01254

## 5. P2mg-II (Boat-II)

Total Energy = -1368.123494235 eV

Lattice Parameters; b = 4.5439 c = 4.3062

C 0.02111 -0.09326 -0.43181

H 0.05615 0.00993 -0.50448

## 6. P2gg (Twist-Boat)

Total Energy = -1367.941316739 eV

Lattice Parameters; a = 4.4097 c = 4.9755

C 0.59034 0.02135 0.61539

H 0.62177 0.09284 0.56074
